# Supplementary material for: The Rating Form of IBD Patient Concerns: Translation, Validation, and First Implementation of the Greek Version
Source: Hindawi journal article supplement (doi:10.1155/2017/6267175), 2017-01-01
Supplement: f1 [file 6267175.f1.pdf]

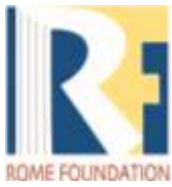

# ROME FOUNDATION

*To improve the lives of people with Functional GI Disorders*

## **BOARD OF DIRECTORS**

Douglas A. Drossman, MD  
President  
Chapel Hill, NC USA

Fernando Azpiroz, MD, PhD  
Barcelona, Spain

Giovanni Barbara, MD  
Bologna, Italy

Lin Chang, MD  
Los Angeles, CA USA

William Chey, MD  
Ann Arbor, MI, USA

John Kellow, MD, FRACP  
New South Wales, Australia

Jan Tack, MD, PhD  
Leuven, Belgium

Max Schmulson, MD  
Mexico City, Mexico

Magnus Simrén, MD, PhD  
Gothenburg, Sweden

Ami Sperber, MD MSPH  
Beer-Sheva, Israel

William E. Whitehead, PhD  
Chapel Hill, NC USA

## **Former Board Members**

Robin C. Spiller, MD, MSC  
Nottingham, England  
2000-2014

Nicholas J. Talley, MD, PhD  
Callaghan, Australia  
1990-2011

Enrico Corazziari, MD  
Rome, Italy  
1989-2010

W. Grant Thompson, MD  
Ottawa, Canada  
1989-2008

Michel Delvaux, MD, PhD  
Nancy, France  
1999-2006

## **Executive Director**

Wink Hilliard  
Raleigh, NC 27628  
Phone: 919-787-5859  
Fax: 919-900-7646  
Cell: 919-345-3927  
wnhilliard@aol.com  
whilliard@theromefoundation.org

## **Public Relations Director**

Ceciel Rooker  
Chapel Hill, NC USA  
Phone: (843) 364-4292  
crooker@theromefoundation.org

## **Administrators**

Michele Pickard  
Franklinton, NC USA  
Phone: (919) 539-3051  
mpickard@theromefoundation.org

Claudia Rojas  
Chapel Hill, NC USA  
crojas@theromefoundation.org

April 14, 2015

Eleftheria Roma MD  
Emeritus Professor of Pediatric Gastroenterology  
University of Athens, Greece

Re: Rome Foundation Approval of Translation to Greek

Dear Eleftheria,

We have received your documentation relating to the translation of the Rating Form of IBD Patient Concerns (RFIPC) into Greek.

Thanks to you and Dr. Konstantinos Argyriou for this excellent job and important contribution to the body of translated Rome Foundation material.

We are pleased to extend official Rome Foundation approval of the translation.

Sincerely,

Ami D. Sperber, MD, MSPH  
Head, Rome Translation Project

CC: Dr. Konstantinos Argyriou

P.O. Box 6524; Raleigh, NC 27628  
Phone: 919-787-5859 ~ Fax: 919-900-7646  
[www.theromefoundation.org](http://www.theromefoundation.org)
